# Supplementary material for: Enhanced activity towards oxygen electrocatalysis for rechargeable Zn–air batteries by alloying Fe and Co in N-doped carbon
Source: Royal Society of Chemistry journal article supplement (doi:10.1039/d1dt02787e), 2021-01-01
Supplement: d1dt02787e1.pdf [file d1dt02787e1.pdf]

## Supporting information

### Enhanced Activity towards Oxygen Electrocatalysis for Rechargeable Zn-Air Batteries by Alloying Fe and Co in N-Doped Carbon

*Fengjiao Yu, Qi Ying, Shaofeng Ni, Chenxue Li, Daxiang Xue and Yang Yang\**

State Key Laboratory of Materials-Oriented Chemical Engineering, College of  
Chemical Engineering, Nanjing Tech University, Nanjing 211816, China

\*Corresponding Author; Email: yangy@njtech.edu.cn

## Experimental

### Materials

All reagents and chemicals were of analytical grade and used without further purification.  $\text{Co}(\text{AC})_2 \cdot 4\text{H}_2\text{O}$  (99%, AR),  $\text{Fe}(\text{NO}_3)_3 \cdot 9\text{H}_2\text{O}$  (99%, AR),  $\text{NH}_4\text{Cl}$  (99%, AR) and glucose (99%, AR) were purchased from Sinopharm Chemical Reagent. HCl (98%), potassium hydroxide and dicyandiamide were obtained from Shanghai Lingfeng Reagent. Nafion (5 wt%) was obtained from Aldrich. Commercial Pt/C (20 wt.%) was obtained from Johnson Matthey Chemicals Ltd. and  $\text{RuO}_2$  (99.9%) was purchased from Aladdin Industrial Corporation.

### Synthesis of FeCo/N-C, Fe/N-C and Co/N-C

The typical synthetic process was as follows: 2 g of dicyandiamide, 10 g of ammonium chloride, 0.15 mmol of  $\text{Co}(\text{Ac})_2 \cdot 4\text{H}_2\text{O}$  and 0.15 mmol of  $\text{Fe}(\text{NO}_3)_3 \cdot 9\text{H}_2\text{O}$  were dissolved in 200 mL deionized water, followed by freeze-drying. Then 4 g of freeze-dried powder was placed in a crucible and heated at 450 °C for 2 h with a rate of 2 °C/min from room temperature to 450 °C.

For the synthesis of FeCo/N-C, 0.5 g FeCo-doped *g*- $\text{C}_3\text{N}_4$  was dispersed in 35 mL of 0.03 M glucose solution under sonication for 2 h. Then the above mixture was heated at 90 °C for 12 h to get dry powder. For the calcination process, the powder was annealed at 450 °C for 1 h at a speed of 2 °C/min, followed by 850 °C for 2 h at a speed of 8 °C/min under  $\text{N}_2$  atmosphere. After cooling down, the carbonized products were soaked with hydrochloric acid (1 M) overnight, washed by deionized water several times and dried at 80 °C overnight. The as-prepared sample was named as FeCo/N-C ( $\text{Fe}_5\text{Co}_5\text{-NC}$ ). Fe/N-C or Co/N-C samples were prepared with merely addition of Co or Fe precursors.

We also varied the ratio of Fe and Co precursors for optimization. The FeCo/N-C sample has a precursor molar ratio of Fe:Co = 5:5. FeCo 2:8 and FeCo 8:2 were prepared by the same procedure with different molar ratios but constant metal content.

### Characterizations

Scanning electron microscopy (SEM) was performed on a Hitachi S-4800 microscope. X-ray diffraction (XRD) measurements were conducted from 5° to 80° at a scan rate of

0.2°/s on an intelligent laboratory diffractometer (Rigaku Inc.). Transmission electron microscopy (TEM) and high resolution transmission electron microscopy (HRTEM) studies were performed on a JEOL 2100 Plus microscope at 200 kV. The TEM microscopes are equipped with energy dispersive X-ray spectrometers (EDX) for elemental analysis. X-ray photoelectron spectroscopy (XPS) spectra were obtained by Thermo 250XI instrument. The Raman spectra were collected on a Labram HR Evolution instrument with a wavelength range from 500 to 2000 cm<sup>-1</sup>.

### Electrochemical Measurements

For preparation of working electrode, 2 mg of electrocatalyst samples was dispersed in a mixed solution containing 380 μL anhydrous ethanol, 20 μL Nafion and 100 μL deionized water, and under ultrasonic for 2 h until a uniformly dispersed black suspension was formed. Then 16 μL of the ink was dropped on the surface of a rotating disc electrode (RDE) with a final loading density of 0.326 mg/cm<sup>2</sup>. The resulting electrode served as the working electrode.

The electrocatalytic performance of the samples was tested on a workstation (Ivium-n-Stat) equipped with a high-speed rotator at room temperature. The RDE as the working electrode, graphite rod as the counter electrode and Ag/AgCl electrode (3.5 M KCl) as the reference electrode, compose a three-electrode test system. And the electrolyte solution is KOH. The potentials were converted to RHE according to the following formula:  $E_{\text{RHE}} = E_{\text{Ag/AgCl}} + 0.059 \cdot \text{pH} + E^{\ominus}_{\text{Ag/AgCl}}$ .

The linear sweep voltammetry (LSV) measurement was performed in the voltage range from 0.2 V to 1.2 V vs. RHE for ORR and from 0.9 V to 1.8 V vs. RHE for OER. The working electrode scanned the LSV curves in KOH solution saturated with O<sub>2</sub> at different speeds (900, 1225, 1600, 2025 and 2500 rpm) with a scan rate of 5 mV/s. The electron transfer number (*n*) can be calculated through the following Koutecky-Levich (K-L) equations:

$$\frac{1}{j} = \frac{1}{j_L} + \frac{1}{j_K} = \frac{1}{B\omega^{1/2}} \quad (1)$$

$$B = 0.62nFC_{O_2} (D_{O_2})^{2/3} \nu^{-1/6} \quad (2)$$

where,  $J$  is the measured current density,  $J_K$  is the kinetic current density, and  $J_L$  is the limiting diffusion current density,  $\omega$  is the rotating speed of the rotating disc electrode, rpm,  $n$  is the electron transfer number,  $F$  is Faraday constant, 96485 C/mol,  $C_{O_2}$  is the oxygen concentration in an oxygen-saturated 0.1 M KOH solution,  $1.2 \times 10^{-3}$  mol/L,  $D_{O_2}$  is the diffusion coefficient of oxygen in 0.1 M KOH solution saturated with oxygen,  $1.9 \times 10^{-3}$  cm<sup>2</sup>/s, The  $\nu$  is the kinematic viscosity coefficient of oxygen saturated 0.1 M KOH solution,  $1.2 \times 10^{-3}$  cm<sup>2</sup>/s.

The tolerance of methanol was tested by chronocurrent method ( $I-t$ ) at a voltage of 0.6V vs. RHE, with addition of 1 M methanol at 300 s.

### **Zn-Air Battery Tests**

The air cathode was prepared by loading the synthesized sample on carbon paper with a weight of 1 mg/cm<sup>2</sup>. The zinc plate was used as anode and 6 M KOH solution containing 0.2 M ZnCl<sub>2</sub> was used as the electrolyte. The charge–discharge cycling test was carried out at room temperature, with the current density of 10 mA/cm<sup>2</sup>, and each period of 10 min.

## Figures

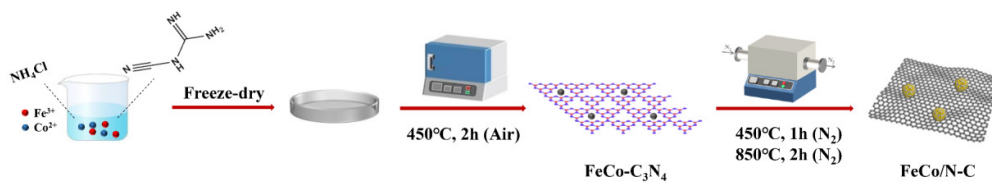

**Scheme S1.** Illustration of the two-step synthesis of the FeCo/N-C catalyst.

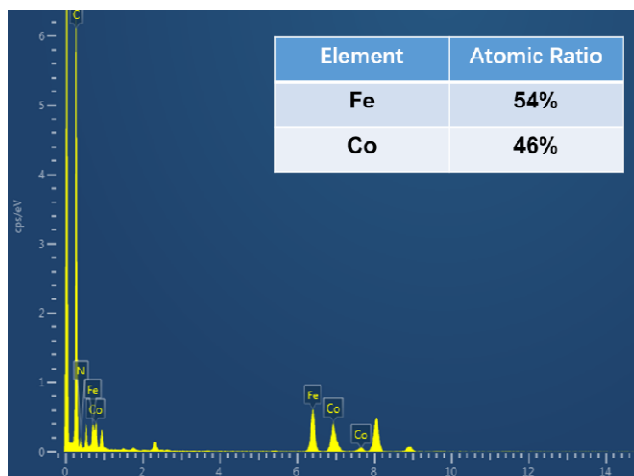

**Figure S1.** EDX spectrum of FeCo/N-C sample with inset showing the atomic ratio of Fe and Co elements.

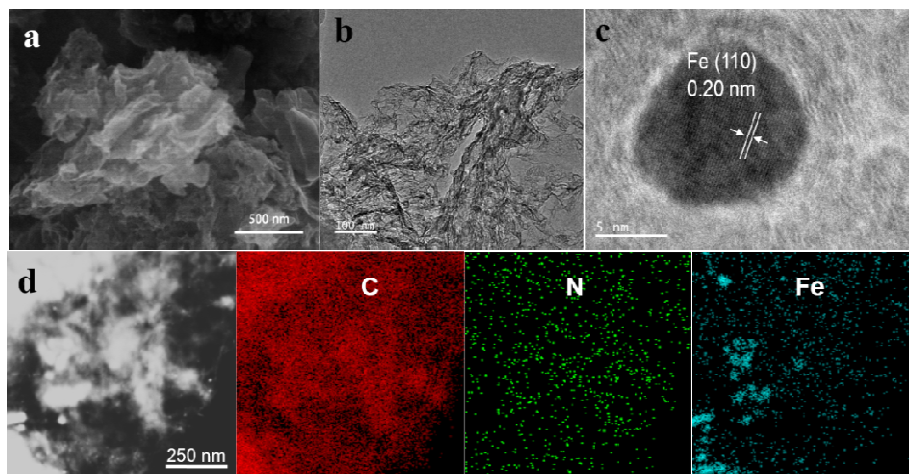

**Figure S2.** (a) SEM and (b) low-magnification TEM images of Fe/N-C. (c) HRTEM image of one Fe nanoparticle embedded in the carbon layers. (d) HAADF image and elemental mappings of C, N and Fe.

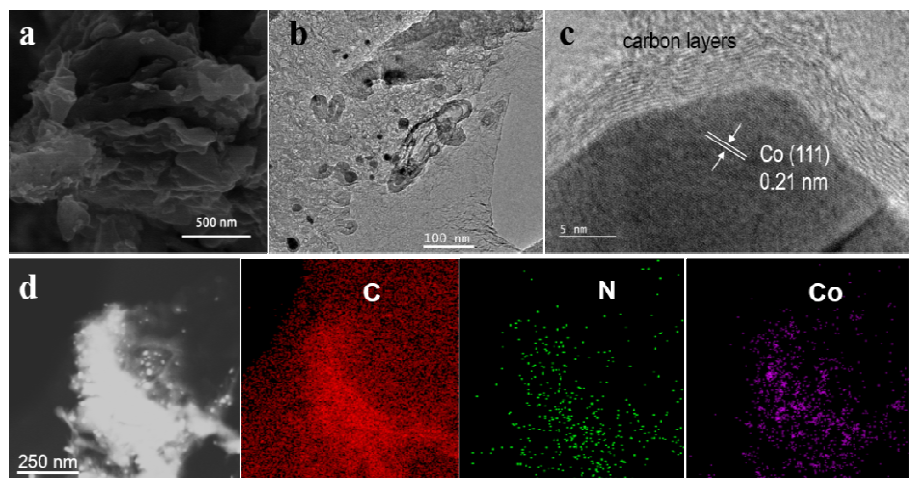

**Figure S3.** (a) SEM and (b) low-magnification TEM images of Co/N-C. (c) HRTEM image of one Co nanoparticle embedded in the carbon layers. (d) HAADF image and elemental mappings of C, N and Co.

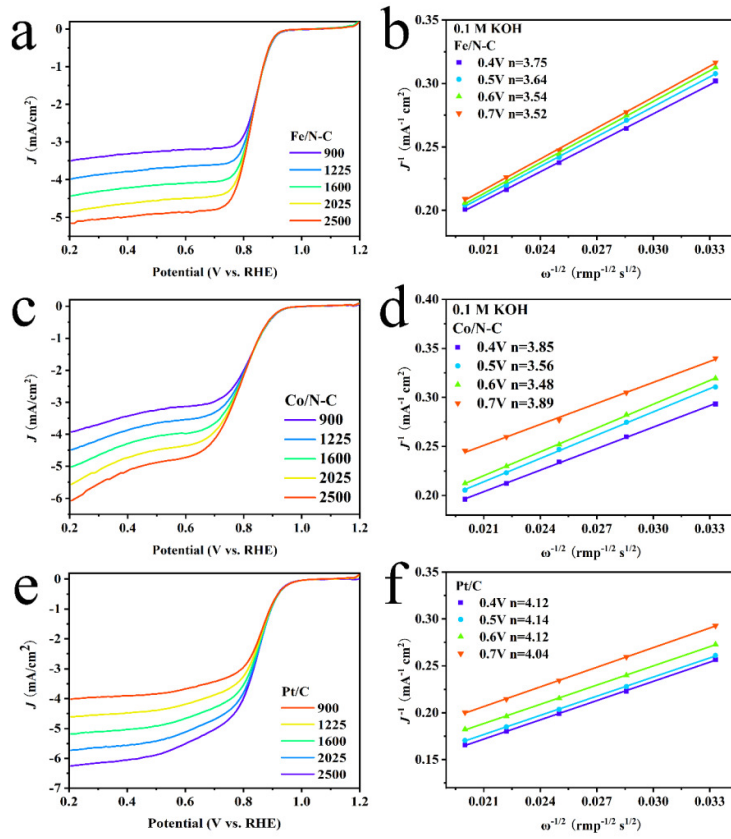

**Figure S4.** (a, c, e) LSV polarization curves at various rotation speeds in 0.1 M KOH and (b, d, f) the respective K-L plots at diverse potentials for Fe/N-C, Co/N-C and Pt/C.

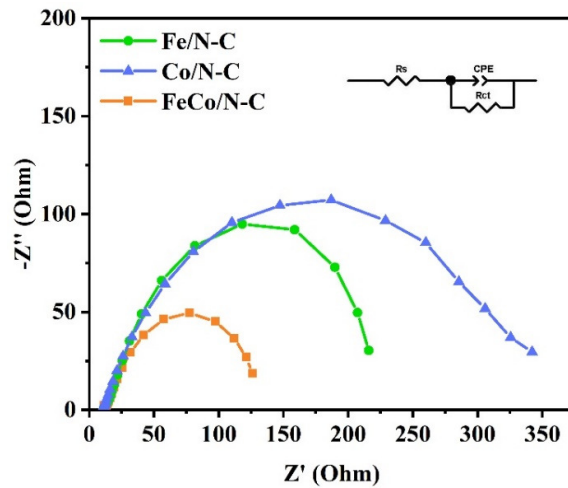

**Figure S5.** EIS spectra and equivalent circuit diagram of Fe/N-C, Co/N-C and FeCo/N-C.

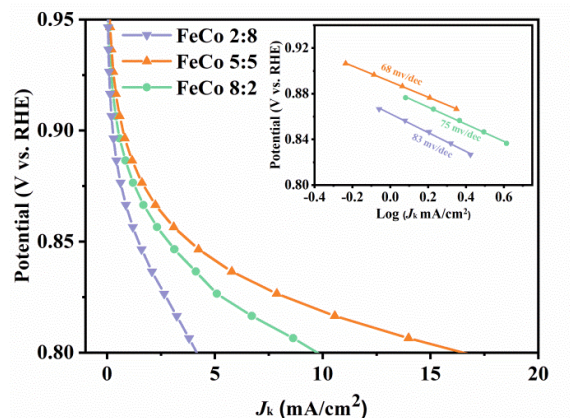

**Figure S6.** ORR specific kinetic current densities ( $J_k$ ) and corresponding Tafel plots of FeCo 2:8, 5:5 and 8:2 catalysts (inset).

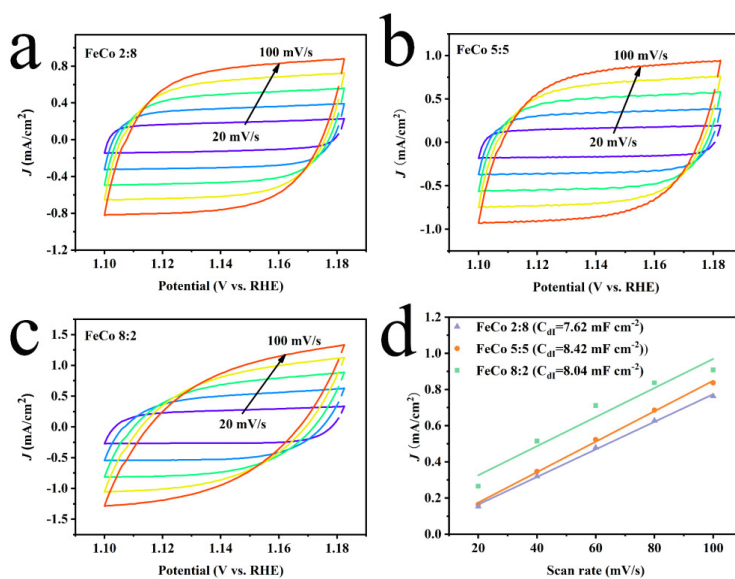

**Figure S7.** CV plots with different scan rates in 0.1 M KOH solution for (a) FeCo 2:8, (b) 5:5 and (c) 8:2 catalysts. (d) Current densities as a function of the scan rate for the examined catalysts showing the  $C_{dl}$  values of the three samples.



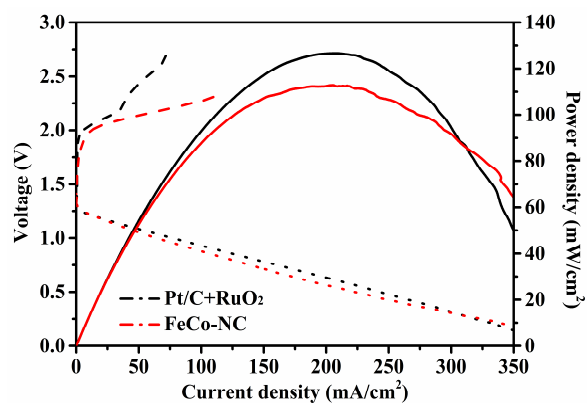

**Figure S8.** Charge and discharge polarization curves and corresponding power density curves of the Zn-air batteries with Pt/C+RuO<sub>2</sub> and FeCo/NC as the air cathode catalysts.

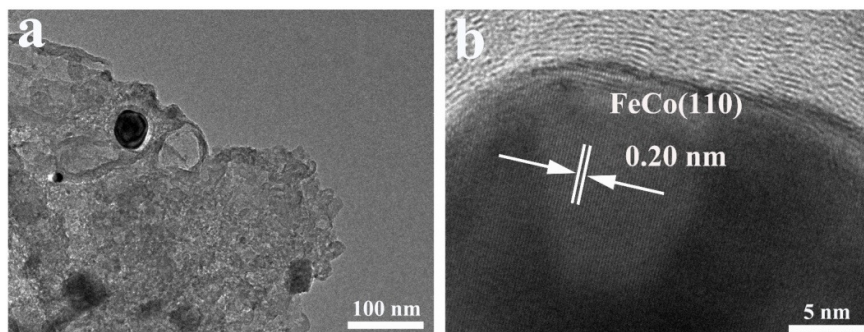

**Figure S9.** TEM images of FeCo/N-C catalyst after cycling test in Zn-air battery and the lattice fringes can be indexed to FeCo (110) planes.

**Table S1.** Summary of the performance of reported transition-metal based bifunctional catalysts.

| Electrocatalyst                                              | $E_{1/2}$   | $E_{10}$    | $\Delta E$ (V) | Tafel slope |       | Loading<br>(mg/cm <sup>2</sup> ) | Electrolyte<br>KOH           | Reference |
|--------------------------------------------------------------|-------------|-------------|----------------|-------------|-------|----------------------------------|------------------------------|-----------|
|                                                              | (V vs. RHE) | (V vs. RHE) |                | ORR         | OER   |                                  |                              |           |
| FeCo/N-C                                                     | 0.84        | 1.575       | 0.735          | 68          | 88    | 0.33                             | ORR: 0.1 M KOH; OER: 1 M KOH | this work |
| Fe/N-C                                                       | 0.82        | 1.647       | 0.827          | 70          | 102   | 0.33                             | ORR: 0.1 M KOH; OER: 1 M KOH | this work |
| Co/N-C                                                       | 0.79        | 1.677       | 0.887          | 102         | 99    | 0.33                             | ORR: 0.1 M KOH; OER: 1 M KOH | this work |
| Fe-N-C/<br>NiFe-LDH                                          | 0.792       | 1.539       | 0.747          | /           | /     | 0.2                              | 0.1 M KOH                    | [1]       |
| FeCo-N-C-700                                                 | 0.896       | 1.6         | 0.704          | 87          | 72    | 0.4                              | 0.1 M KOH                    | [2]       |
| Fe <sub>0.5</sub> Co <sub>0.5</sub> O <sub>x</sub> /Nr<br>GO | 0.747       | 1.487       | 0.74           | 62.2        | 30.1  | 0.5                              | 0.1 M KOH                    | [3]       |
| FePc-GO                                                      | 0.89        | 1.65        | 0.76           | /           | 112   | 0.2                              | 0.1 M KOH                    | [4]       |
| CoFe <sub>2</sub> O <sub>4</sub>                             | 0.73        | 1.64        | 0.91           | 53          | /     | 0.15                             | 0.1 M KOH                    | [5]       |
| NiFe <sub>2</sub> O <sub>4</sub>                             | 0.68        | 1.64        | 0.96           | 57          | /     | 0.15                             | 0.1 M KOH                    | [5]       |
| Ni <sub>3</sub> FeN/NRGO                                     | 0.7         | 1.63        | 0.93           | /           | /     | 0.1                              | 0.1 M KOH                    | [6]       |
| FeCo <sub>(a)</sub> -ACM                                     | 0.9         | 1.6         | 0.7            | 79.73       | 261.2 | 0.4                              | ORR: 0.1 M KOH; OER: 1 M KOH | [7]       |
| FeCo-NGS-800                                                 | 0.84        | 1.61        | 0.77           | 102.5       | 108.2 | 0.2                              | ORR: 0.1 M KOH; OER: 1 M KOH | [8]       |
| Co <sub>0.5</sub> Fe <sub>0.5</sub> S@N-<br>MC               | 0.81        | 1.64        | 0.83           | 67          | 159   | 0.8                              | ORR: 0.1 M KOH; OER: 1 M KOH | [9]       |
| Mn/Co-N-C                                                    | 0.8         | 1.66        | 0.86           | 77          | 145   | 0.25                             | 0.1 M KOH                    | [10]      |
| NiCo <sub>2</sub> S <sub>4</sub> HSs                         | 0.8         | 1.63        | 0.83           | 48.6        | 93.7  | 0.5                              | 0.1 M KOH                    | [11]      |
| Co <sub>3</sub> FeS <sub>1.5</sub> (OH) <sub>6</sub>         | 0.721       | 1.588       | 0.867          | 96          | 79    | 0.25                             | 0.1 M KOH                    | [12]      |
| Co-Ni-S@NSP<br>C                                             | 0.82        | 1.7         | 0.88           | /           | 114   | 0.39                             | 0.1 M KOH                    | [13]      |
| NiCoO <sub>2</sub> /CNTs                                     | 0.67        | 1.66        | 0.99           | /           | 156   | 0.51                             | 0.1 M KOH                    | [14]      |
| CoFe/N-GCT                                                   | 0.79        | 1.67        | 0.88           | 71          | 106   | 0.597                            | 0.1 M KOH                    | [15]      |
| FeCo/N-DNC                                                   | 0.81        | 1.62        | 0.81           | /           | 68    | 0.102                            | 0.1 M KOH                    | [16]      |

**Table S2.** Comparison of the performance of Zinc-air batteries of FeCo/N-C and other reported catalysts.

| Electrocatalyst                        | power density<br>(mW cm <sup>-2</sup> ) | Loading<br>(mg/cm <sup>2</sup> ) | Note             | Reference |
|----------------------------------------|-----------------------------------------|----------------------------------|------------------|-----------|
| FeCo/N-C                               | 112.7                                   | 1                                |                  | this work |
| CoSe <sub>2</sub> -NCNT NSA            | 51.1                                    | -                                | flexible battery | [17]      |
| Co-SAs@NC                              | 105.3                                   | 1.75                             |                  | [18]      |
| Ni-Co-S/NSC                            | 137                                     | 2                                |                  | [19]      |
| CoNi-SAs/NC                            | 101.4                                   | 1.4                              |                  | [20]      |
| MnO/Co/PGC                             | 172                                     | 10                               |                  | [21]      |
| CoS <sub>x</sub> /Co-NC-800            | 103                                     | 1                                |                  | [22]      |
| CoNMC-700-1                            | 69.6                                    | 1                                |                  | [23]      |
| S-GNS/NiCo <sub>2</sub> S <sub>4</sub> | 216                                     | 0.42                             |                  | [24]      |

- [1] S. Dresp, F. Luo, R. Schmack, S. Kuehl, M. Gliech, P. Strasser, *Energy Environ. Sci.* **2016**, *9*, 2020.
- [2] X. Duan, S. Ren, N. Pan, M. Zhang, H. Zheng, *J. Mater. Chem. A* **2020**, *8*, 9355.
- [3] L. Wei, H. E. Karahan, S. Zhai, H. Liu, X. Chen, Z. Zhou, Y. Lei, Z. Liu, Y. Chen, *Adv. Mater.* **2017**, *29*, 1701410.
- [4] W. Wan, C. A. Triana, J. Lan, J. Li, C. S. Allen, Y. Zhao, M. Iannuzzi, G. R. Patzke, *ACS Nano* **2020**, *14*, 13279.
- [5] C. Si, Y. Zhang, C. Zhang, H. Gao, W. Ma, L. Lv, Z. Zhang, *Electrochim. Acta* **2017**, *245*, 829.
- [6] Y. Fan, S. Ida, A. Staykov, T. Akbay, H. Hagiwara, J. Matsuda, K. Kaneko, T. Ishihara, *Small* **2017**, *13*, 1700099.
- [7] C. Chen, D. Cheng, S. Liu, Z. Wang, M. Hu, K. Zhou, *Energy Storage Mater.* **2020**, *24*, 402.
- [8] C. Chen, Y. Li, D. Cheng, H. He, K. Zhou, *ACS Appl. Mater. Interfaces* **2020**, *12*, 40415.
- [9] M. Shen, C. Ruan, Y. Chen, C. Jiang, K. Ai, L. Lu, *ACS Appl. Mater. Interfaces* **2015**, *7*, 1207.
- [10] L. Wei, L. Qiu, Y. Liu, J. Zhang, D. Yuan, L. Wang, *ACS Sustainable Chem. Eng.* **2019**, *7*, 14180.
- [11] X. Feng, Q. Jiao, H. Cui, M. Yin, Q. Li, Y. Zhao, H. Li, W. Zhou, C. Feng, *ACS*

- Appl. Mater. Interfaces* **2018**, *10*, 29521.
- [12] H.-F. Wang, C. Tang, B. Wang, B.-Q. Li, Q. Zhang, *Adv. Mater.* **2017**, *29*, 1702327.
- [13] W. Fang, H. Hu, T. Jiang, G. Li, M. Wu, *Carbon* **2019**, *146*, 476.
- [14] L. Ma, H. Zhou, Y. Sun, S. Xin, C. Xiao, A. Kumatani, T. Matsue, P. Zhang, S. Ding, F. Li, *Electrochim. Acta* **2017**, *252*, 338.
- [15] X. Liu, L. Wang, P. Yu, C. Tian, F. Sun, J. Ma, W. Li and H. Fu, *Angew. Chem. Int. Ed.*, **2018**, *57*, 16166.
- [16] G. Fu, Y. Liu, Y. Chen, Y. Tang, J. B. Goodenough and J. M. Lee, *Nanoscale*, **2018**, *10*, 19937.
- [17] W. Liu, D. Zheng, L. Zhang, R. Yin, X. Xu, W. Shi, F. Wu, X. Cao and X. Lu, *Nanoscale*, **2021**, *13*, 3019.
- [18] X. Han, X. Ling, Y. Wang, T. Ma, C. Zhong, W. Hu and Y. Deng, *Angew. Chem. Int. Ed.* **2019**, *58*, 5359.
- [19] Z. Wu, H. Wu, T. Niu, S. Wang, G. Fu, W. Jin and T. Ma, *ACS Sustain. Chem. Eng.*, **2020**, *8*, 9226.
- [20] X. Han, X. Ling, D. Yu, D. Xie, L. Li, S. Peng, C. Zhong, N. Zhao, Y. Deng and W. Hu, *Adv. Mater.*, **2019**, *31*, 1905622.
- [21] X. F. Lu, Y. Chen, S. Wang, S. Gao and X. W. Lou, *Adv. Mater.*, **2019**, *31*, 1902339.
- [22] Q. Lu, J. Yu, X. Zou, K. Liao, P. Tan, W. Zhou, M. Ni and Z. Shao, *Adv. Funct. Mater.*, **2019**, *29*, 1904481.
- [23] Z. Rong, C. Dong, S. Zhang, W. Dong and F. Huang, *Nanoscale*, **2020**, *12*, 6089.
- [24] W. Liu, J. Zhang, Z. Bai, G. Jiang, M. Li, K. Feng, L. Yang, Y. Ding, T. Yu and Z. Chen, *Adv. Funct. Mater.*, **2018**, *28*, 1706675.
